## **Antigenic characterization of the SARS-CoV-2 Omicron subvariant BA.2.75**

Qian Wang<sup>1\*</sup>, Sho Iketani<sup>1\*</sup>, Zhiteng Li<sup>1</sup>, Yicheng Guo<sup>1</sup>, Andre Yanchen Yeh<sup>2</sup>, Michael Liu<sup>1</sup>,  
Jian Yu<sup>1</sup>, Zizhang Sheng<sup>1</sup>, Yaoxing Huang<sup>1</sup>, Lihong Liu<sup>1#</sup>, and David D. Ho<sup>1,3,4#</sup>

<sup>1</sup> Aaron Diamond AIDS Research Center, Columbia University Vagelos College of Physicians and Surgeons, New York, NY, USA.

<sup>2</sup> School of Medicine, National Taiwan University, Taipei, Taiwan

<sup>3</sup> Department of Microbiology and Immunology, Columbia University Vagelos College of Physicians and Surgeons, New York, NY, USA.

<sup>4</sup> Division of Infectious Diseases, Department of Medicine, Columbia University Vagelos College of Physicians and Surgeons, New York, NY, USA.

\*Equal contribution

#Address correspondence to Lihong Liu ([ll3411@cumc.columbia.edu](mailto:ll3411@cumc.columbia.edu)) or David D. Ho ([dh2994@cumc.columbia.edu](mailto:dh2994@cumc.columbia.edu)), Columbia University Vagelos College of Physicians and Surgeons, 701 W. 168<sup>th</sup> Street, New York, NY 10032, USA.

Word count: 2835

## Abstract

1 The SARS-CoV-2 Omicron subvariant BA.2.75 emerged recently and appears to be spreading  
2 rapidly. It has nine mutations in its spike compared to BA.2, raising concerns it may further  
3 evade vaccine-elicited and therapeutic antibodies. Here, we found BA.2.75 to be moderately  
4 more neutralization resistant to sera from vaccinated/boosted individuals than BA.2 (1.8-fold),  
5 similar to BA.2.12.1 (1.1-fold), but more neutralization sensitive than BA.4/5 (0.6-fold). Relative  
6 to BA.2, BA.2.75 showed heightened resistance to class 1 and class 3 monoclonal antibodies to  
7 the receptor-binding domain, while gaining sensitivity to class 2 antibodies. The resistance was  
8 largely conferred by the G446S and R460K mutations. Of note, BA.2.75 was slightly resistant  
9 (3.7-fold) to bebtelovimab, the only therapeutic antibody with potent activity against all Omicron  
10 subvariants. BA.2.75 also exhibited higher receptor binding affinity than other Omicron  
11 subvariants. BA.2.75 provides yet another example of the ongoing evolution of SARS-CoV-2 as  
12 it gains transmissibility while incrementally evading antibody neutralization.

## 13 **Main text**

14 The COVID-19 pandemic is currently dominated by the SARS-CoV-2 (severe acute respiratory  
15 syndrome coronavirus 2) Omicron subvariant BA.5. Yet another subvariant known as BA.2.75  
16 has recently emerged from India, where it has spread rapidly, displacing the predominant BA.2  
17 subvariant locally. Moreover, BA.2.75 has now been identified in at least 25 countries  
18 worldwide<sup>1</sup> (**Extended Data Fig. 1a**). Though a descendent from BA.2, it contains a distinct set  
19 of mutations in its spike protein, including five substitutions in the N-terminal domain (NTD),  
20 K147E, W152R, F157L, I210V, and G257S, and four substitutions in the receptor-binding  
21 domain (RBD), D339H, G446S, N460K, and R493Q (**Extended Data Fig. 1b**). Many of these  
22 mutations are located at sites targeted by neutralizing antibodies and may also affect the binding  
23 affinity of the spike to its receptor, angiotensin-converting enzyme 2 (ACE2). In particular, two  
24 RBD mutations, D339H and N460K, are noteworthy because they have not been identified in  
25 previous SARS-CoV-2 variants and their impacts are not yet known. Newfound variants such as  
26 BA.2.75 that are increasing in frequency raise the concern that the viruses have developed  
27 additional mechanisms to escape from neutralization by antibodies elicited by vaccination or  
28 previous infection, as well as by therapeutic monoclonal antibodies (mAbs) in clinical use.  
29 Therefore, we have evaluated the antibody evasion properties of BA.2.75, and our findings are  
30 reported here.

31  
32 We first set out to profile the antigenic differences of BA.2.75 from the wildtype SARS-CoV-2  
33 D614G and the other currently circulating Omicron subvariants BA.2, BA.2.12.1, and BA.4/5  
34 (note that BA.4 and BA.5 share an identical spike). VSV-pseudotyped viruses of each variant  
35 were produced and then assessed for their neutralization sensitivity to sera from three different  
36 clinical cohorts: those who had received three doses of a COVID-19 mRNA vaccine (boosted)  
37 and patients with either BA.1 or BA.2 breakthrough infection after vaccination. We did not  
38 include sera from persons immunized with only two doses of COVID-19 mRNA vaccines as we  
39 had previously observed that they lacked neutralization capacity against earlier Omicron  
40 subvariants<sup>2,3</sup>. The clinical information for our cohorts is described in **Extended Data Table 1**  
41 and the serum neutralization profiles are shown in **Fig. 1a** and **Extended Data Fig. 2**. Consistent  
42 with previous reports<sup>2-4</sup>, neutralization ID<sub>50</sub> (the 50% inhibitory dose) titers of the “boosted” sera  
43 were substantially lower against BA.2, BA.2.12.1, and BA.4/5 (4.9-fold, 7.8-fold, and 14.8-fold,

44 respectively), compared with D614G. Neutralization titers against BA.2.75 were similar to those  
45 against BA.2.12.1, 8.7-fold lower than D614G, 1.8-fold lower than BA.2, but 1.7-fold higher  
46 than BA.4/5. A similar trend was observed in the “BA.1 and BA.2 breakthrough” cohorts.

47

48 We also investigated the impact of new point mutations found in BA.2.75 on serum antibody  
49 evasion by conducting serum neutralization assays with pseudoviruses containing each point  
50 mutation in the background of BA.2 (**Fig. 1b and Extended Data Fig. 3**). The mutations  
51 W152R, F157L, I210V, G257S, D339H, and N446K each only slightly (0.8-fold to 1.3-fold)  
52 altered the neutralization titers of sera from all three cohorts against BA.2. In contrast, K147E  
53 and N460K impaired the neutralization activity of sera significantly, by 1.6-fold to 1.8-fold and  
54 1.5-fold to 2.4-fold, respectively, while the R493Q reversion mutation modestly enhanced the  
55 neutralization by 1.8-fold to 3.0-fold, as was observed previously<sup>4</sup>.

56

57 We next assessed the neutralization resistance of BA.2.75 to a panel of 23 mAbs directed to  
58 known neutralizing epitopes on the viral spike. Among these, 21 target the four epitope classes in  
59 the RBD<sup>5</sup>, including REGN10987 (imdevimab)<sup>6</sup>, REGN10933 (casirivimab)<sup>6</sup>, COV2-2196  
60 (tixagevimab)<sup>7</sup>, COV2-2130 (cilgavimab)<sup>7</sup>, LY-CoV555 (bamlanivimab)<sup>8</sup>, CB6 (etesevimab)<sup>9</sup>,  
61 Brii-196 (amubarvimab)<sup>10</sup>, Brii-198 (romlusevimab)<sup>10</sup>, S309 (sotrovimab)<sup>11</sup>, LY-CoV1404  
62 (bebtelovimab)<sup>12</sup>, CAB-A17<sup>13</sup>, ZCB11<sup>14</sup>, Omi-3<sup>15</sup>, Omi-18<sup>15</sup>, XGv282<sup>16</sup>, XGv347<sup>16</sup>, S2E12<sup>17</sup>,  
63 A19-46.1<sup>18</sup>, 35B5<sup>19</sup>, and JMB2002<sup>20</sup>, as well as 10-40<sup>21</sup> from our group. The other two mAbs,  
64 C1717<sup>22</sup> and S3H3<sup>23</sup>, target NTD-SD2 and SD1, respectively. Many of the recently isolated  
65 mAbs were chosen because they could neutralize earlier Omicron subvariants<sup>13-20,22,23</sup>.

66

67 The results are presented in **Fig. 2a** as well as in **Extended Data Fig. 4** and **Extended Data**  
68 **Table 2**. Unlike BA.2.12.1, which was largely similar in its antigenic profile to BA.2, BA.2.75  
69 differed from BA.2 across a wide range of the mAbs tested. Antibodies across multiple classes  
70 were impaired against BA.2.75 compared to BA.2, including some in class 1 (CAB-A17, Omi-3,  
71 and Omi-18) and class 3 (XGv282, LY-CoV1404, JMB2002, COV2-2130, and REGN10987).  
72 Simultaneously, several antibodies showed neutralization sensitivity against BA.2.75 relative to

73 BA.2, all within class 2 (S2E12, COV2-2196, and REGN10933). This also contrasts that of  
74 BA.4/5, which demonstrated heightened resistance to class 2 and class 3 antibodies over BA.2,  
75 but did not regain sensitivity to any antibodies. Moreover, even within the resistance to class 3  
76 antibodies, BA.2.75 and BA.4/5 only overlapped with additional resistance towards one antibody,  
77 JMB2002. The other impaired antibodies differed, with 35B5 and Brie-198 losing further activity  
78 against BA.4/5 over BA.2. These data suggest that BA.2.75 has evolved to extend resistance  
79 towards some class 1- and class 3-directed antibodies over BA.2, yet has regained sensitivity for  
80 a subset of class 2 antibodies. Such differences may help to interpret the observations made on  
81 polyclonal serum neutralization (**Fig. 1**).

82

83 Of particular note, BA.2.75 is the first SARS-CoV-2 variant that has demonstrated resistance to  
84 bebtelovimab (LY-CoV1404), albeit modestly at 3.7-fold loss in neutralization (**Fig. 2a**).  
85 Nevertheless, it remained the only clinical mAb that retained potent neutralizing activity against  
86 all the Omicron subvariants with a  $IC_{50}$  (the 50% inhibitory concentration) below 0.01  $\mu\text{g/ml}$ . All  
87 other clinically authorized or approved antibodies or antibody combinations showed a substantial  
88 loss of activity *in vitro* against BA.2.75.

89

90 As we observed that BA.2.75 was resistant to mAbs in a unique way, we set out to identify the  
91 mutations within BA.2.75 that conferred the observed antibody resistance profile. We generated  
92 pseudoviruses carrying each of the point mutations in the background of D614G or BA.2 and  
93 tested their neutralization sensitivity to the aforementioned panel of mAbs and combinations.  
94 These data are shown in **Fig. 2b** and **Extended Data Figs. 5 and 6**. G446S impaired or  
95 abolished the neutralizing activity of class 3 mAbs (XGv282, JMB2002, and REGN10987), as  
96 previously observed in our BA.1 studies<sup>2</sup>. That this mutation did not result in a significant loss in  
97 polyclonal serum neutralization (**Fig. 1b**) suggests that such antibodies may be rare in a  
98 polyclonal response. The N460K substitution conferred resistance to all of the class 1 RBD  
99 mAbs tested, as well as one class 2 mAb (ZCB11). However, this resistance was only observed  
100 in the context of BA.2 for three of the class 1 antibodies (CAB-A17, Omi-3, and Omi-18) and  
101 the class 2 antibody ZCB11, but not in the context of D614G. In contrast, R493Q, also found in  
102 BA.4/5<sup>4</sup>, sensitized BA.2 to neutralization by several class 1 and 2 RBD mAbs, which is

103 consistent with our previous study<sup>4</sup>. We note that while the NTD mutation K147E had a  
104 significant impact on polyclonal sera (**Fig. 1b**), we did not observe an effect by this mutation  
105 against the panel of mAbs tested here, suggesting that this mutation may be acting through non-  
106 RBD antibodies.

107

108 We conducted structural modeling to further investigate the impact of the G446S and N460K  
109 mutations (**Fig. 2c**). Analysis on G446S revealed steric hindrance to binding by class 3 RBD  
110 mAbs (XGv282 and JMB2002), as we reported previously<sup>2</sup>. In addition, structural modeling of  
111 N460K revealed that K460 abolished a common hydrogen bond between RBD-N460 and S56 in  
112 CDRH2 of VH3-53 class antibodies<sup>5</sup>, such as CB6, Omi-3, and Omi-18, although it is not  
113 immediately clear why the loss in activity for Omi-3 and Omi-18 was only apparent in the  
114 background of BA.2 but not D614G.

115

116 Finally, as receptor binding affinity may play a role in transmissibility, we investigated this  
117 property for BA.2.75. The binding affinity of purified spike trimer proteins of D614G, BA.2,  
118 BA.4/5, and BA.2.75 to dimeric human ACE2 (hACE2) was quantified using surface plasmon  
119 resonance (SPR). We found BA.2.75 exhibited the highest receptor binding affinity, with a  $K_D$   
120 value 7.0-fold and 2.4-fold lower than values for BA.2 and BA.4/5, respectively (**Fig. 2d**). To  
121 validate these results, we tested pseudoviruses bearing these spikes for neutralization by dimeric  
122 hACE2 (**Extended Data Fig. 7**). A comparison of  $IC_{50}$  values suggested that BA.2.75 was  
123 slightly more sensitive to hACE2 than the other pseudoviruses tested, in line with was observed  
124 in the SPR. To probe the role of the mutations in BA.2.75 for ACE2 binding, we tested the  
125 neutralization by hACE2 of each of the point mutants in the background of BA.2. R493Q was  
126 the most sensitive to hACE2 neutralization, and N460K was most resistant. These results parallel  
127 our previous studies, in which we found R493Q could serve to restore the lost receptor binding  
128 affinity due to a resistance-conferring mutation in BA.4/5<sup>4</sup>. A similar mechanism, in which  
129 R493Q acts to balance the compromised affinity caused by N460K, may be in action for BA.2.75.

130

131 In summary, we have systematically evaluated the antigenic properties of the new SARS-CoV-2  
132 Omicron subvariant BA.2.75, which is spreading throughout the world. Our data suggest that  
133 BA.2.75 exhibits a higher resistance to vaccine-induced and infection-induced serum  
134 neutralizing activity than BA.2 (**Fig. 1a**). It is reassuring that BA.2.75 does not show greater  
135 immune evasion from polyclonal sera than the BA.4/5 subvariant (**Fig. 1a**). The resistance  
136 profile of BA.2.75 to sera can be largely attributed to the K147E and N460K mutations (**Fig. 1b**).  
137 The latter mutation is consistent with findings from deep mutational scanning of the RBD<sup>24</sup>. The  
138 impact of the former mutation is puzzling in that previous Omicron subvariants have already  
139 abolished the activity of the antibodies directed to the NTD antigenic supersite<sup>2-4</sup> and yet this  
140 new variant evolved to contain five additional NTD mutations. Why is SARS-CoV-2 doing so  
141 when NTD antibodies contribute only a small portion of the serum virus-neutralizing  
142 activity<sup>25,26</sup>?

143

144 BA.2.75 exhibits a unique neutralizing profile for mAbs, with heightened resistance over BA.2  
145 to class 1 and class 3 RBD antibodies, while gaining sensitivity towards class 2 RBD antibodies  
146 (**Fig. 2a**). Although the impairment is slight, BA.2.75 is the first SARS-CoV-2 variant to show  
147 discernible resistance to betelovimab (LY-CoV1404). Profiling of the individual mutations  
148 within BA.2.75 revealed that G446S and N460K could contribute to the resistance (**Fig. 2b**).  
149 These mutations appear to be acting through steric hindrance or abrogation of a hydrogen bond  
150 (**Fig. 2c**). More importantly, these findings on BA.2.75 demonstrate that our one remaining  
151 therapeutic antibody with potent activity to treat COVID-19 is now under threat. Another  
152 mutation proximal to residue 446 of the spike could knock out the current arsenal of therapeutic  
153 monoclonals. Although numerous mAbs have been isolated and shown to neutralize the new  
154 Omicron subvariants<sup>13-20,22,23</sup>, their development pathway to prove clinical efficacy has become  
155 rather daunting with the availability of effective vaccines and antiviral drugs.

156

157 Finally, our data demonstrate that BA.2.75 has enhanced binding affinity to its receptor ACE2,  
158 which may enhance its transmission (**Fig. 2d**). However, it is still unclear whether BA.2.75 could  
159 out-compete BA.5, today's dominant form globally. The features of BA.2.75 that diverged from  
160 other Omicron subvariants serve to underscore the ability of SARS-CoV-2 to evolve,

161 incrementally gaining transmissibility and antibody evasion, and to reinforce the importance of  
162 vaccination and booster campaigns as well as epidemiologic surveillance to detect the emergence  
163 of new SARS-CoV-2 variants.



164 **References**

- 165 1. Shu, Y. & McCauley, J. GISAID: Global initiative on sharing all influenza data - from vision to  
166 reality. *Euro Surveill* **22**(2017).
- 167 2. Liu, L., *et al.* Striking antibody evasion manifested by the Omicron variant of SARS-CoV-2. *Nature*  
168 **602**, 676-681 (2022).
- 169 3. Iketani, S., *et al.* Antibody evasion properties of SARS-CoV-2 Omicron sublineages. *Nature* **604**,  
170 553-556 (2022).
- 171 4. Wang, Q., *et al.* Antibody evasion by SARS-CoV-2 Omicron subvariants BA.2.12.1, BA.4, & BA.5.  
172 *Nature* (2022).
- 173 5. Barnes, C.O., *et al.* SARS-CoV-2 neutralizing antibody structures inform therapeutic strategies.  
174 *Nature* **588**, 682-687 (2020).
- 175 6. Hansen, J., *et al.* Studies in humanized mice and convalescent humans yield a SARS-CoV-2  
176 antibody cocktail. *Science* **369**, 1010-1014 (2020).
- 177 7. Zost, S.J., *et al.* Potently neutralizing and protective human antibodies against SARS-CoV-2.  
178 *Nature* **584**, 443-449 (2020).
- 179 8. Jones, B.E., *et al.* The neutralizing antibody, LY-CoV555, protects against SARS-CoV-2 infection in  
180 nonhuman primates. *Sci Transl Med* **13**(2021).
- 181 9. Shi, R., *et al.* A human neutralizing antibody targets the receptor-binding site of SARS-CoV-2.  
182 *Nature* **584**, 120-124 (2020).
- 183 10. Ju, B., *et al.* Human neutralizing antibodies elicited by SARS-CoV-2 infection. *Nature* **584**, 115-  
184 119 (2020).
- 185 11. Pinto, D., *et al.* Cross-neutralization of SARS-CoV-2 by a human monoclonal SARS-CoV antibody.  
186 *Nature* **583**, 290-295 (2020).
- 187 12. Westendorf, K., *et al.* LY-CoV1404 (bebtelovimab) potently neutralizes SARS-CoV-2 variants. *Cell*  
188 *Rep* **39**, 110812 (2022).
- 189 13. Sheward, D.J., *et al.* Structural basis of Omicron neutralization by affinity-matured public  
190 antibodies. *bioRxiv* (2022).
- 191 14. Zhou, B., *et al.* A broadly neutralizing antibody protects Syrian hamsters against SARS-CoV-2  
192 Omicron challenge. *Nat Commun* **13**, 3589 (2022).
- 193 15. Nutalai, R., *et al.* Potent cross-reactive antibodies following Omicron breakthrough in vaccinees.  
194 *Cell* **185**, 2116-2131 e2118 (2022).
- 195 16. Wang, K., *et al.* Memory B cell repertoire from triple vaccinees against diverse SARS-CoV-2  
196 variants. *Nature* **603**, 919-925 (2022).
- 197 17. Starr, T.N., *et al.* SARS-CoV-2 RBD antibodies that maximize breadth and resistance to escape.  
198 *Nature* **597**, 97-102 (2021).
- 199 18. Wang, L., *et al.* Ultrapotent antibodies against diverse and highly transmissible SARS-CoV-2  
200 variants. *Science* **373**(2021).
- 201 19. Wang, X., *et al.* 35B5 antibody potently neutralizes SARS-CoV-2 Omicron by disrupting the N-  
202 glycan switch via a conserved spike epitope. *Cell Host Microbe* **30**, 887-895 e884 (2022).
- 203 20. Yin, W., *et al.* Structures of the Omicron spike trimer with ACE2 and an anti-Omicron antibody.  
204 *Science* **375**, 1048-1053 (2022).
- 205 21. Liu, L., *et al.* An antibody class with a common CDRH3 motif broadly neutralizes sarbecoviruses.  
206 *Sci Transl Med*, eabn6859 (2022).
- 207 22. Wang, Z., *et al.* Analysis of memory B cells identifies conserved neutralizing epitopes on the N-  
208 terminal domain of variant SARS-Cov-2 spike proteins. *Immunity* **55**, 998-1012 e1018 (2022).
- 209 23. Hong, Q., *et al.* Molecular basis of receptor binding and antibody neutralization of Omicron.  
210 *Nature* **604**, 546-552 (2022).

- 211 24. Greaney, A.J., *et al.* Mapping mutations to the SARS-CoV-2 RBD that escape binding by different  
212 classes of antibodies. *Nat Commun* **12**, 4196 (2021).
- 213 25. Greaney, A.J., *et al.* Comprehensive mapping of mutations in the SARS-CoV-2 receptor-binding  
214 domain that affect recognition by polyclonal human plasma antibodies. *Cell Host Microbe* **29**,  
215 463-476 e466 (2021).
- 216 26. Garrett, M.E., *et al.* High-resolution profiling of pathways of escape for SARS-CoV-2 spike-  
217 binding antibodies. *Cell* **184**, 2927-2938 e2911 (2021).
- 218 27. Liu, L., *et al.* Potent neutralizing antibodies against multiple epitopes on SARS-CoV-2 spike.  
219 *Nature* **584**, 450-456 (2020).
- 220 28. Wrapp, D., *et al.* Cryo-EM structure of the 2019-nCoV spike in the prefusion conformation.  
221 *Science* **367**, 1260-1263 (2020).
- 222 29. Chan, K.K., *et al.* Engineering human ACE2 to optimize binding to the spike protein of SARS  
223 coronavirus 2. *Science* **369**, 1261-1265 (2020).
- 224

225 **Figure legends**

226 **Fig. 1 | Serum neutralization profile of BA.2.75. a**, Neutralization of pseudotyped D614G and  
227 Omicron subvariants by sera from three different clinical cohorts. Boosted refers to individuals  
228 who received three doses of a COVID-19 mRNA vaccine, and breakthrough refers to individuals  
229 who were infected and received COVID-19 vaccines. **b**, Serum neutralization of pseudotyped  
230 BA.2 or BA.2 with point mutations from BA.2.75. For both panels, values above the symbols  
231 denote the geometric mean ID<sub>50</sub> values and values on the lower left indicate the sample size (n)  
232 for each group. The limit of detection (LOD) is 100 (dotted line), and values below the LOD are  
233 arbitrarily plotted to allow for visualization of each sample. *P* values were determined by using  
234 two-tailed Wilcoxon matched-pairs signed-rank tests. In **b**, comparisons were made against BA.2.  
235 Significance is denoted with asterisks and the fold-change is also denoted. ns, not significant; \*,  
236 *P* < 0.05; \*\*, *P* < 0.01; \*\*\*, *P* < 0.001; and \*\*\*\*, *P* < 0.0001.

237 **Fig. 2 | Neutralization of BA.2.75 by monoclonal antibodies and receptor binding affinity. a**,  
238 Neutralization of pseudotyped D614G and Omicron subvariants by NTD-SD2-, SD1-, and RBD-  
239 directed mAbs. Values above the LOD of 10<sup>4</sup> μg/mL (dotted line) are arbitrarily plotted to allow  
240 for visualization of each sample. **b**, Fold change in IC<sub>50</sub> values for the neutralization of  
241 pseudotyped point mutants, relative to D614G or BA.2, with resistance colored red and  
242 sensitization colored green. **c**, Modeling of the impact of G446S and N460K on antibody  
243 neutralization. Clashes are shown as red discs and hydrogen bonds are shown as dashed lines. **d**,  
244 Binding affinity of D614G, BA.2, BA.2.75, and BA.4/5 stabilized spike trimers to dimeric  
245 human ACE2. NA, not applicable.

246

247 **Methods**

248

249 **Serum samples**

250 Sera from individuals who received three doses of the mRNA-1273 or BNT162b2 vaccines were  
251 collected at Columbia University Irving Medical Center (referred to as “boosted” in the text).  
252 Sera from individuals who were infected by an Omicron subvariant (BA.1 or BA.2) following  
253 vaccinations were collected from December 2021 to May 2022 at Columbia University Irving  
254 Medical Center (referred to as “BA.1 or BA.2 breakthrough” in the text). All samples were  
255 confirmed for prior SARS-CoV-2 infection status by anti-nucleoprotein (NP) ELISA, and the  
256 variant involved in breakthrough cases were determined by sequencing. All collections were  
257 conducted under protocols reviewed and approved by the Institutional Review Board of  
258 Columbia University. All participants provided written informed consent. Clinical information  
259 on the different cohorts of study subjects is provided in **Extended Data Table 1**.

260

261 **Cell lines**

262 Expi293 cells were obtained from Thermo Fisher Scientific (A14527); Vero-E6 cells were  
263 obtained from the ATCC (CRL-1586); HEK293T cells were obtained from the ATCC (CRL-  
264 3216). Cells were purchased from authenticated vendors and morphology was confirmed visually  
265 before use. All cell lines tested mycoplasma negative.

266

267 **Monoclonal antibodies**

268 Antibodies were expressed in-house as previously described<sup>27</sup>. For each of the antibodies in this  
269 study, heavy chain variable (VH) and light chain variable (VL) genes were synthesized  
270 (GenScript), cloned into an expression vector, transfected into Expi293 cells (Thermo Fisher  
271 Scientific), and purified from the cellular supernatant by affinity purification using rProtein A  
272 Sepharose (GE). REGN10987, REGN10933, COV2-2196, and COV2-2130 were provided by  
273 Regeneron Pharmaceuticals; Brie-196 and Brie-198 were provided by Brie Biosciences; CB6 was  
274 provided by B. Zhang and P. Kwong (NIH); and ZCB11 was provided by Z. Chen (HKU).

275

276 **Construction of SARS-CoV-2 spike plasmids**

277 Spike expression constructs for D614G, BA.2, BA.2.12.1, and BA.4/5 were previously  
278 generated<sup>2-4</sup>. Expression constructs encoding the BA.2.75 spike, as well as the individual  
279 mutations found in BA.2.75, were generated using the QuikChange II XL site-directed  
280 mutagenesis kit according to the manufacturer's instructions (Agilent). For expression of  
281 stabilized soluble S2P spike trimer proteins, 2P substitutions (K986P and V987P in WA1) and a  
282 "GSAS" substitution of the furin cleavage site (682-685aa in WA1) were introduced into the  
283 spike-expressing plasmids for stabilization as previously described<sup>28</sup>, and then the ectodomain  
284 (1-1208aa in WA1) of the spike was fused with a C-terminal 8x His-tag and cloned into the pA  
285 vector. All constructs were confirmed by Sanger sequencing prior to use.

286

### 287 **Expression and purification of SARS-CoV-2 stabilized spike trimers and human ACE2**

288 Stabilized SARS-CoV-2 spike trimer proteins of D614G and the Omicron subvariants were  
289 generated by transfecting Expi293 cells with each of the stabilized spike trimer expression  
290 constructs using 1 mg mL<sup>-1</sup> polyethylenimine (PEI), and then purifying the spike trimer from the  
291 supernatants five days post-transfection using Ni-NTA resin (Invitrogen) according to the  
292 manufacturer's instructions<sup>27</sup>. Dimeric human ACE2-IgG1 (hACE2) was generated by  
293 transfecting Expi293 cells with pcDNA3-sACE2-WT(732)-IgG1<sup>29</sup> (Addgene plasmid #154104,  
294 gift from Erik Procko) using 1 mg mL<sup>-1</sup> PEI and then purifying from the supernatant five days  
295 post-transfection using rProtein A Sepharose (GE) according to the manufacturer's instructions.  
296 All proteins were confirmed for purity and size by SDS-PAGE prior to use.

297

### 298 **Surface plasmon resonance**

299 Surface plasmon resonance (SPR) binding assays for hACE2 binding to SARS-CoV-2 stabilized  
300 spike trimers were performed using a Biacore T200 biosensor equipped with a Series S CM5  
301 chip (Cytiva), in a running buffer of 10 mM HEPES pH 7.4, 150 mM NaCl, 3 mM EDTA,  
302 0.05% P-20 (Cytiva) at 25 °C. Spike proteins were captured through their C-terminal His-tag  
303 over an anti-His antibody surface. These surfaces were generated using the His-capture kit  
304 (Cytiva) according to the manufacturer's instructions, resulting in approximately 10,000 RU of  
305 anti-His antibody over each surface. An anti-His antibody surface without antigen was used as a  
306 reference flow cell to remove bulk shift changes from the binding signal. For each spike, binding  
307 to hACE2 was tested using a three-fold dilution series with concentrations ranging from 2.46 nM

308 to 200 nM. The association and dissociation rates were each monitored for 60 s and 600 s  
309 respectively, at 30  $\mu\text{L}/\text{min}$ . The bound spike/hACE2 complex was regenerated from the anti-His  
310 antibody surface using 10 mM glycine pH 1.5. Blank buffer cycles were performed by injecting  
311 running buffer instead of hACE2 remove systematic noise from the binding signal. The resulting  
312 data was processed and fit to a 1:1 binding model using Biacore Evaluation Software.

313

### 314 **Pseudovirus production**

315 Pseudotyped SARS-CoV-2 (pseudoviruses) were produced in the vesicular stomatitis virus (VSV)  
316 background, in which the native VSV glycoprotein was replaced by that of SARS-CoV-2 and its  
317 variants, as previously described<sup>27</sup>. HEK293T cells were transfected with the appropriate spike  
318 expression construct using 1 mg  $\text{mL}^{-1}$  PEI and cultured overnight at 37°C under 5%  $\text{CO}_2$ , and  
319 then infected with VSV-G pseudotyped  $\Delta\text{G}$ -luciferase (G\* $\Delta\text{G}$ -luciferase, Kerafast) 24 h post-  
320 transfection. After 2 h of infection, cells were washed three times, changed to fresh medium,  
321 and then cultured for approximately another 24 h before the supernatants were collected,  
322 clarified by centrifugation, and aliquoted and stored at -80 °C until further use.

323

### 324 **Pseudovirus neutralization assay**

325 Prior to use in the neutralization assay, all pseudoviruses were first titrated to equilibrate the viral  
326 input between assays. Five-fold serial dilutions of heat-inactivated sera, antibodies, or hACE2  
327 were prepared in media in 96-well plates in triplicate, starting at 1:100 dilution for sera and  
328 10  $\mu\text{g}\text{mL}^{-1}$  for antibodies and hACE2. Pseudoviruses were then added to wells and the virus-  
329 sample mixture was incubated at 37°C for 1 h, except for hACE2, where no incubation was  
330 conducted. Control wells with the virus only were included on all plates. Vero-E6 cells were then  
331 added at a density of  $3 \times 10^4$  cells per well and the plates were incubated at 37°C for  
332 approximately 10 h. Cells were then lysed and luciferase activity was quantified using the  
333 Luciferase Assay System (Promega) according to the manufacturer's instructions with SoftMax  
334 Pro v.7.0.2 (Molecular Devices). Neutralization curves and  $\text{IC}_{50}$  values were derived by fitting a  
335 nonlinear five-parameter dose-response curve to the data in GraphPad Prism v.9.2.

336

### 337 **Structural modeling of RBD mutations**

338 The structures of antibody-spike complexes for modeling were obtained from PDB (7WLC  
339 (XGv282), 7XOD (JMB2002), 7C01 (CB6), 7ZF3 (Omi-3), and 7ZFB (Omi-18)). PyMOL  
340 v.2.3.2 was used to perform mutagenesis, to identify steric clashes and hydrogen bonds between  
341 RBD and antibodies, and to generate structural plots (Schrödinger, LLC).

342 **Acknowledgements**

343 This study was supported by funding from the Gates Foundation, JPB Foundation, Andrew and  
344 Peggy Cherng, Samuel Yin, Carol Ludwig, David and Roger Wu, Regeneron Pharmaceuticals,  
345 and the NIH SARS-CoV-2 Assessment of Viral Evolution (SAVE) Program. We are grateful to  
346 Michael T. Yin, Magdalena E. Sobieszczyk, Jennifer Y. Chang, Jayesh G. Shah, and David  
347 S. Perlin for providing serum samples from COVID-19 patients. We thank all who have  
348 contributed their data to GISAID.

349

350 **Author contributions**

351 D.D.H. and L.L. conceived this project. Q.W., A.Y.Y., and L.L. constructed the spike expression  
352 plasmids and produced pseudoviruses. Q.W., S.I., and L.L. conducted pseudovirus neutralization  
353 experiments. Q.W., Z.L., A.Y.Y., and L.L. purified SARS-CoV-2 spike and ACE2 proteins and  
354 performed SPR. Y.G. and Z.S. conducted bioinformatic analyses. Q.W. managed the project.  
355 J.Y. and M.L. produced antibodies. D.D.H. and L.L. directed and supervised the project. Q.W.,  
356 S.I., Y.G., L.L., and D.D.H. analyzed the results and wrote the manuscript.

357

358 **Competing interests**

359 S.I, J.Y., Y.H., L.L., and D.D.H. are inventors on patent applications (WO2021236998) or  
360 provisional patent applications (63/271,627) filed by Columbia University for a number of  
361 SARS-CoV-2 neutralizing antibodies described in this manuscript. Both sets of applications are  
362 under review. D.D.H. is a co-founder of TaiMed Biologics and RenBio, consultant to WuXi  
363 Biologics and Brie Biosciences, and board director for Vicarious Surgical.

364

365 **Additional information**

366 Correspondence and requests for materials should be addressed to L.L. or D.D.H.

367

368 **Data availability**

369 All data are provided in the manuscript. Materials in this study will be made available under an  
370 appropriate Materials Transfer Agreement. Sequences for BA.2.75 prevalence analysis were  
371 downloaded from GISAID (<https://www.gisaid.org/>). The structures used for analysis in this



372 study are available from PDB under IDs 7WLC (XGv282), 7XOD (JMB2002), 7C01 (CB6),  
373 7ZF3 (Omi-3), and 7ZFB (Omi-18).

374 **Extended Data Legends**

375

376 **Extended Data Fig. 1 | Prevalence of BA.2.75 and mutations found in BA.2.75 spike. a,** The  
377 cumulative number of BA.2.75 sequences found in India and globally, and the number of  
378 countries reporting BA.2.75 cases, were tabulated from GISAID. **b,** Spike mutations found in  
379 BA.2.75 relative to BA.2.

380

381 **Extended Data Fig. 2 | Neutralization curves for serum against pseudotyped D614G and**  
382 **Omicron subvariants.** Neutralization by **a,** boosted vaccinee sera on pseudoviruses. **b,** BA.1  
383 breakthrough sera on pseudoviruses. **c,** BA.2 breakthrough sera on pseudoviruses. Error bars  
384 denote mean  $\pm$  SEM for three technical replicates.

385

386 **Extended Data Fig. 3 | Neutralization curves for serum against pseudotyped BA.2 and BA.2**  
387 **carrying individual mutations from BA.2.75.** Neutralization by **a,** boosted vaccinee sera. **b,**  
388 BA.1 breakthrough sera. **c,** BA.2 breakthrough sera. Error bars denote mean  $\pm$  SEM for three  
389 technical replicates.

390

391 **Extended Data Fig. 4 | Neutralization curves for mAbs against pseudotyped D614G and**  
392 **Omicron subvariants.** Data are shown as mean  $\pm$  SEM from three technical replicates.

393

394 **Extended Data Fig. 5 | Neutralization curves for mAbs against pseudotyped D614G**  
395 **carrying individual mutations from BA.2.75.** Data are shown as mean  $\pm$  SEM from three  
396 technical replicates.

397

398 **Extended Data Fig. 6 | Neutralization curves for mAbs against pseudotyped BA.2 carrying**  
399 **individual mutations from BA.2.75.** Data are shown as mean  $\pm$  SEM from three technical  
400 replicates.

401

402 **Extended Data Fig. 7 | Neutralization of pseudotyped D614G and Omicron subvariants by**  
403 **ACE2.** Sensitivity of pseudotyped D614G, Omicron subvariants, and BA.2 carrying individual  
404 mutations from BA.2.75 to hACE2 inhibition. The hACE2 concentrations resulting in 50%

405 inhibition of infectivity ( $IC_{50}$ ) are denoted. Data are shown as mean  $\pm$  standard error of mean  
406 (SEM) for three technical replicates.

407

408 **Extended Data Table 1 | Demographics of clinical cohorts in this study.**

409

410 **Extended Data Table 2 |  $IC_{50}$  values for pseudovirus neutralization by mAbs against**

411 **D614G, Omicron subvariants, and D614G and BA.2 carrying individual mutations from**

412 **BA.2.75.**

**Fig. 1**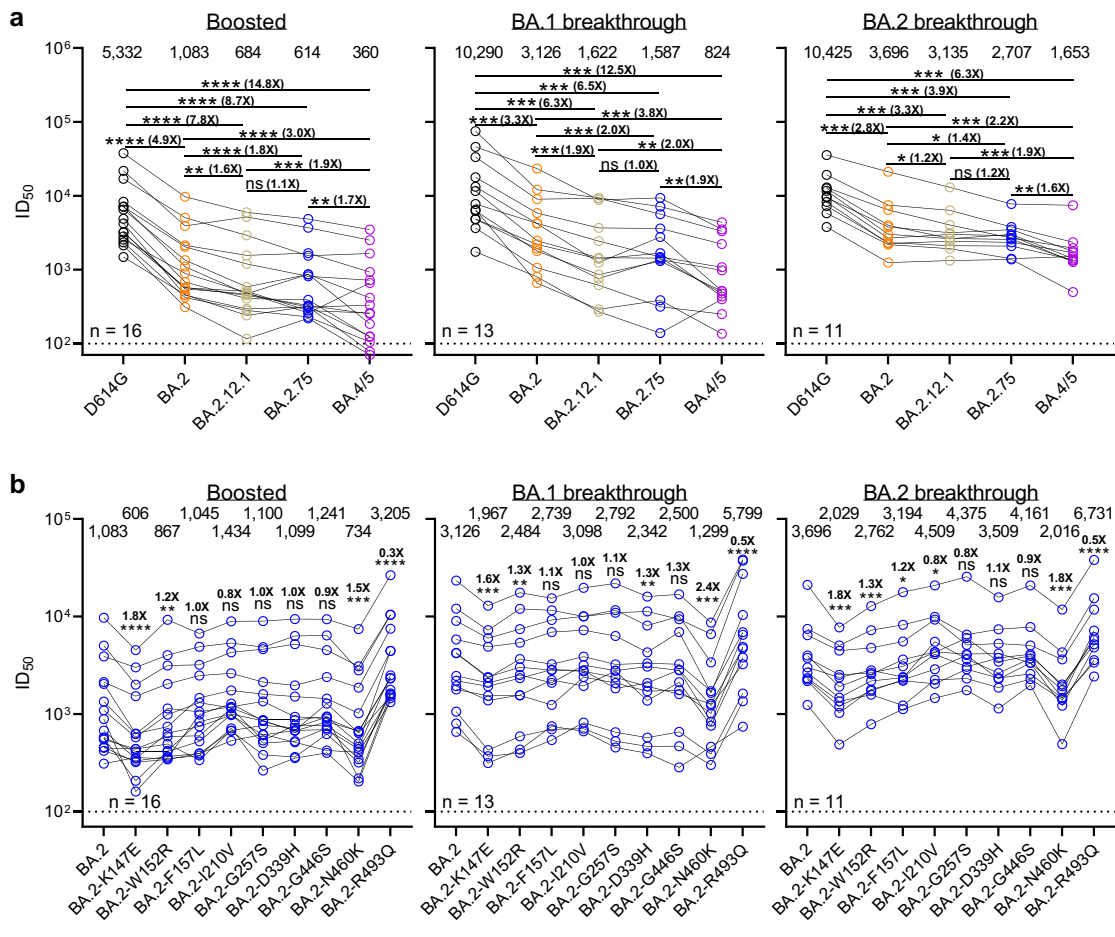

**Fig. 2**

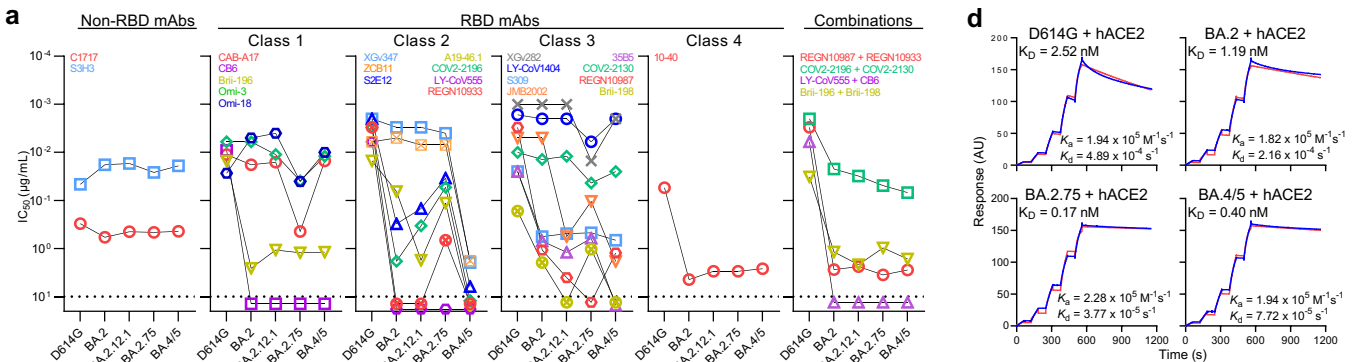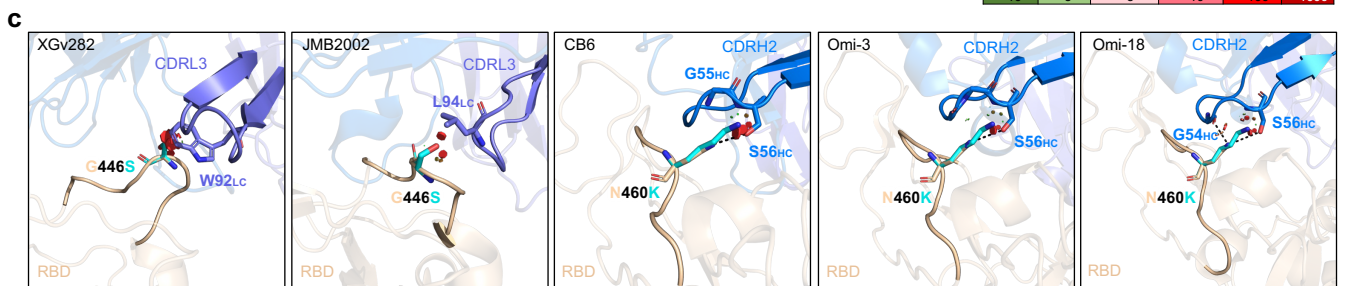

>10   >3   <-3   <-10   <-100   <-1000
